# Supplementary material for: Genetic disruption of slc4a10 alters the capacity for cellular metabolism and vectorial ion transport in the choroid plexus epithelium
Source: PubMed Central journal article supplement (PMC6945596; doi:10.1186/s12987-019-0162-5), 2020-01-07
Supplement: 12987_2019_162_MOESM1_ESM.pdf [file 12987_2019_162_MOESM1_ESM.pdf]

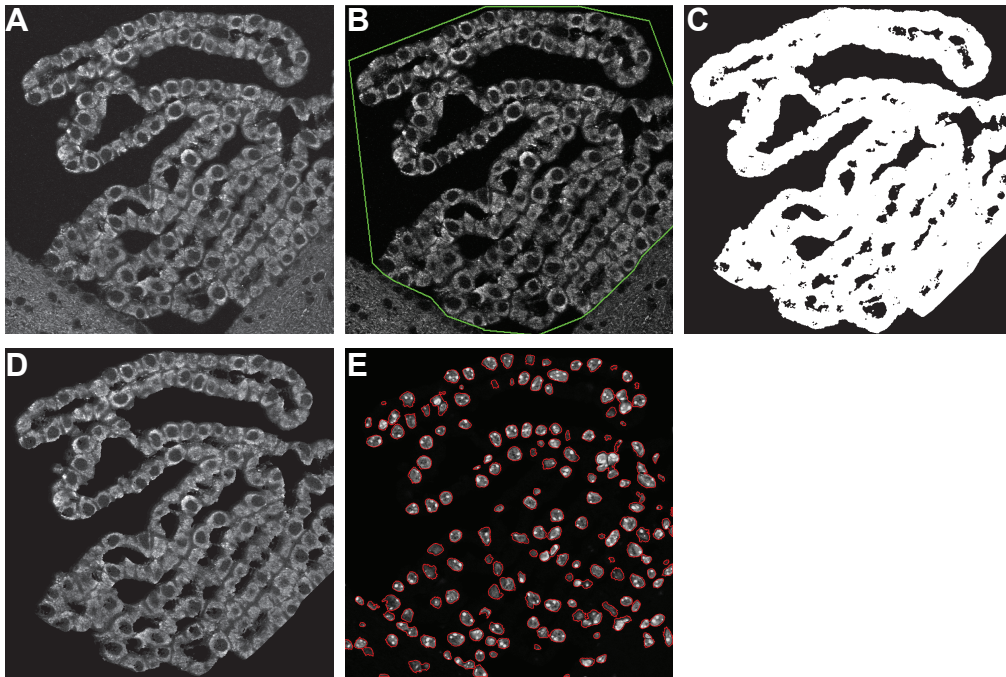

Supplemental Figure 1
